# Supplementary material
Source: Springer Nature journal article supplement (https://www.springermedizin.de/resource/supplementary/13054_2013_2974_MOESM2_ESM.pdf/9712024)
Supplement: MOESM2 [file 9712024]

### CASES

Adult ICU patients diagnosed with sepsis\* > 48h after admission (with no previous cultures ordered)  
n = 109

22 received continuous renal replacement therapy

19 received scheduled NSAIDs and/or acetaminophen

9 diagnosed with severe head trauma

59 patients (all charts reviewed)

19 had a fever > 38.3°C within 48h of ICU admission

6 were diagnosed with suspected infection within 48h of ICU admission

2 had cultures positive only for contaminants

Septic patients  
n = 32

### CONTROLS

Adult ICU patients without a diagnosis of sepsis and an ICU LOS of 2 to 4 days  
n = 776

18 received continuous renal replacement therapy

85 received scheduled NSAIDs and/or acetaminophen

12 diagnosed with severe head trauma

661 patients

50 patients randomly selected for chart review

5 had a fever > 38.3°C during the study period

8 were diagnosed with suspected infection during their ICU admission

8 had infections documented < 5 days after ICU discharge

Control patients  
n = 29

Computerized query of electronic medical records

Detailed chart review by study investigator
